# Supplementary material for: Direct admission to the intensive care unit from the emergency department and mortality in critically ill hematology patients
Source: PubMed Central journal article supplement (PMC6775178; doi:10.1186/s13613-019-0587-7), 2019-10-02
Supplement: 13613_2019_587_MOESM3_ESM.pdf [file 13613_2019_587_MOESM3_ESM.pdf]

**Additional file 3:** Loveplot. Absolute mean differences in patient characteristics before (unadjusted) and after (adjusted) matching on propensity score

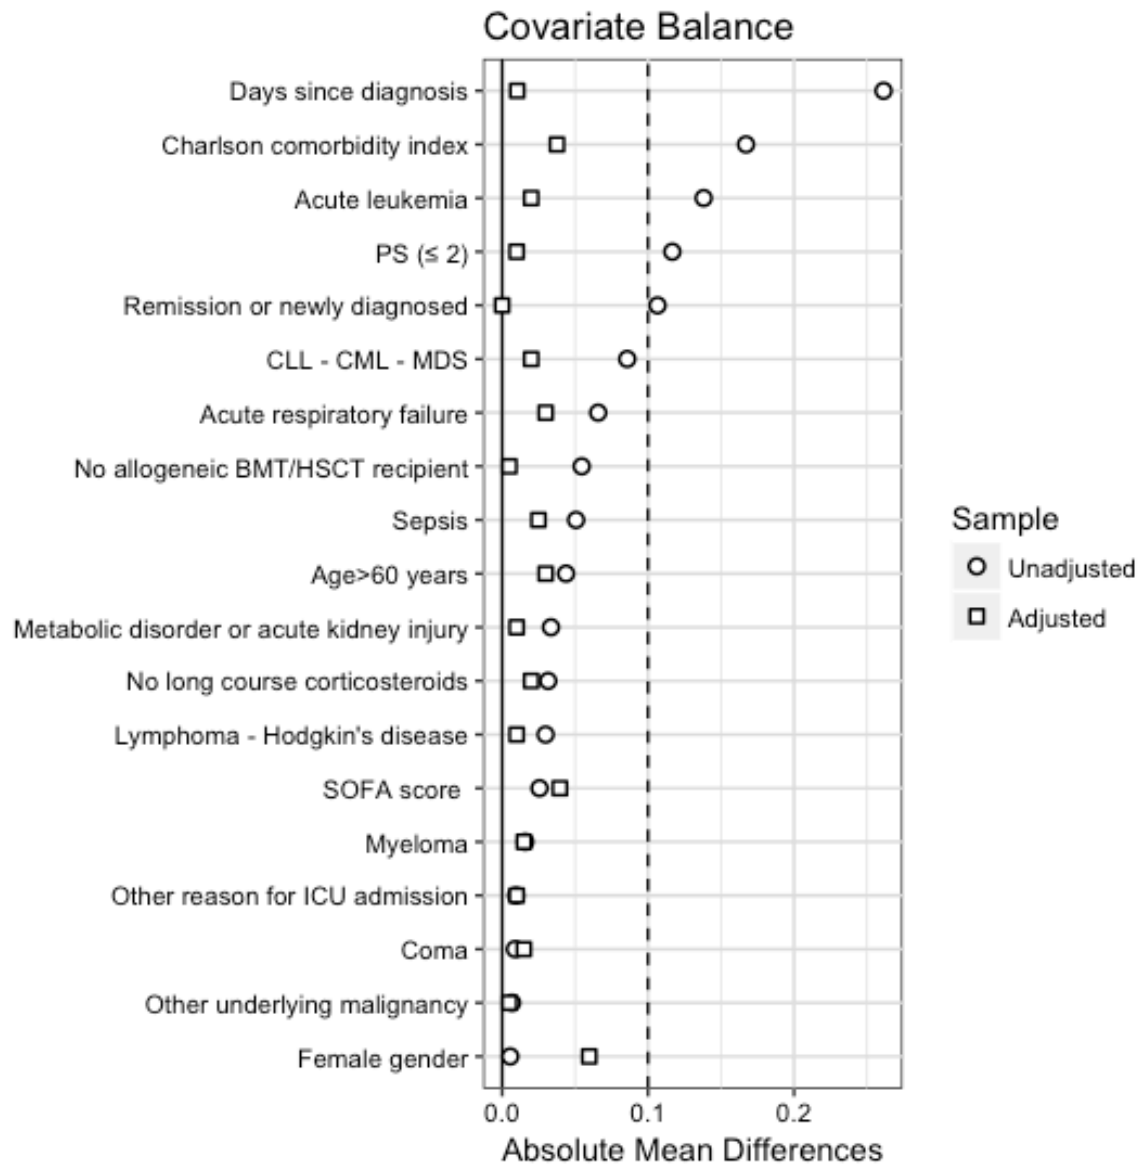

*BMT* bone marrow transplantation, *CLL* chronic lymphocytic leukemia, *CML* chronic myeloid leukemia, *HSCT* hematopoietic stem-cell transplantation, *ICU* intensive care unit, *MDS* myelodysplastic syndrome, *PS* performance status, *SOFA* Sequential Related Organ Failure Assessment
