# Supplementary material for: Direct admission to the intensive care unit from the emergency department and mortality in critically ill hematology patients
Source: Springer Nature journal article supplement (doi:10.1186/s13613-019-0587-7), 2019-10-02
Supplement: MOESM1 [file 17232926]

**Additional file 1:** Univariable analysis. Variables associated with hospital mortality

| Variable                                                   | OR         | 95% CI         | P        | Missing data |
|------------------------------------------------------------|------------|----------------|----------|--------------|
| Age > 60 years                                             | 1.48       | (1.15 to 1.91) | 0.003    | 0            |
| Male gender                                                | 1.22       | (0.94 to 1.58) | 0.16     | 0            |
| Underlying malignancy                                      |            |                | 0.41     | 0            |
| Acute leukemia                                             | 1          |                |          |              |
| Chronic malignancy (CLL, CML, MDS)                         | 0.95       | (0.63 to 1.41) |          |              |
| Lymphoma                                                   | 0.96       | (0.70 to 1.30) |          |              |
| Myeloma                                                    | 0.68       | (0.44 to 1.04) |          |              |
| Other                                                      | 1.20       | (0.66 to 2.17) |          |              |
| Disease status                                             |            |                | 0.005    | 54           |
| Complete or partial remission or newly diagnosed           | 1          |                |          |              |
| Other                                                      | 1.48       | (1.12 to 1.94) |          |              |
| Days since diagnosis                                       | 1.00/day   | (0.99 to 1.01) | 0.99     | 97           |
| Allogeneic BMT/HSCT recipient                              | 1.86       | (1.30 to 2.65) | 0.0007   | 3            |
| Long course corticosteroids                                | 1.28       | (0.99 to 1.66) | 0.07     | 5            |
| Charlson comorbidity index                                 | 1.10/point | (1.04 to 1.15) | 0.0001   | 1            |
| Poor PS (>2)                                               | 2.50       | (1.83 to 3.44) | <0.00001 | 6            |
| Reason for ICU admission                                   |            |                | 0.06     | 55           |
| Sepsis or septic shock                                     | 1          |                |          |              |
| Acute respiratory failure                                  | 1.54       | (1.11 to 2.14) |          |              |
| Coma                                                       | 1.27       | (0.73 to 2.19) |          |              |
| Metabolic disorder or acute kidney injury                  | 0.97       | (0.60 to 1.55) |          |              |
| Other                                                      | 1.09       | (0.71 to 1.66) |          |              |
| SOFA score                                                 | 1.22/point | (1.18 to 1.26) | <0.00001 | 1            |
| Days between hospitalization and first call to intensivist | 1.01/day   | (1.01 to 1.02) | <0.00001 | 44           |
| Days between first call to intensivist and ICU admission   | 1.00/day   | (0.93 to 1.07) | 0.31     | 5            |
| ICU admission requested by emergency physician             | 0.65       | (0.47 to 0.90) | 0.01     | 12           |
| Experience of the physician requesting ICU                 |            |                | 0.25     | 25           |
| Senior physician                                           | 1          |                |          |              |
| Fellow                                                     | 0.76       | (0.53 to 1.08) |          |              |
| Resident/intern                                            | 0.84       | (0.59 to 1.20) |          |              |
| Number of calls before ICU admission $\geq$ 2              | 1.33       | (0.88 to 2.01) | 0.21     | 151          |
| Direct admission from the ED to the ICU                    | 0.64       | (0.47 to 0.86) | 0.004    | 0            |

*BMT* bone marrow transplantation, *CLL* chronic lymphocytic leukemia, *CML* chronic myeloid leukemia, *ED* emergency department, *HSCT* hematopoietic stem-cell transplantation, *ICU* intensive care unit, *MDS* myelodysplastic syndrome, *PS* performance status, *SOFA* Sequential Related Organ Failure Assessment
