# Supplementary material for: Direct admission to the intensive care unit from the emergency department and mortality in critically ill hematology patients
Source: Springer Nature journal article supplement (doi:10.1186/s13613-019-0587-7), 2019-10-02
Supplement: MOESM2 [file 17232926]

**Additional file 2:** Comparison of patient characteristics according to direct ICU admission

|                                           | Direct ICU admission from the ED |               |
|-------------------------------------------|----------------------------------|---------------|
|                                           | No (n=742)                       | Yes (n=266)   |
| Age > 60 years, n (%)                     | 346 (46.6)                       | 145 (54.5)    |
| Female gender, n (%)                      | 291 (39.2)                       | 105 (39.5)    |
| Underlying malignancy, n (%)              |                                  |               |
| ALL - AML                                 | 284 (38.3)                       | 63 (23.7)     |
| CLL - CML - MDS                           | 85 (11.5)                        | 55 (20.7)     |
| Lymphoma - Hodgkin's disease              | 246 (33.2)                       | 98 (36.8)     |
| Myeloma                                   | 90 (12.1)                        | 36 (13.5)     |
| Other                                     | 37 (5.0)                         | 14 (5.3)      |
| Disease status, n (%)                     |                                  |               |
| Remission or newly diagnosed              | 468 (66.4)                       | 146 (58.6)    |
| Other                                     | 237 (33.6)                       | 103 (41.4)    |
| Days since diagnosis, median [IQR]        | 139 [9-760]                      | 290 [1-1,651] |
| Allogeneic BMT/HSCT recipient, n (%)      | 121 (16.4)                       | 25 (9.4)      |
| Long course corticosteroids, n (%)        | 287 (38.9)                       | 94 (35.5)     |
| Charlson comorbidity index, median [IQR]  | 4 [3-5]                          | 4 [3-6]       |
| Poor PS (> 2), n (%)                      | 164 (22.2)                       | 34 (12.9)     |
| Reason for ICU admission, n (%)           |                                  |               |
| Sepsis or septic shock                    | 170 (24.3)                       | 85 (33.7)     |
| Acute respiratory failure                 | 295 (42.1)                       | 79 (31.3)     |
| Coma                                      | 53 (7.6)                         | 16 (6.3)      |
| Metabolic disorder or acute kidney injury | 75 (10.7)                        | 36 (14.3)     |

|                                  |            |            |
|----------------------------------|------------|------------|
| Other                            | 108 (15.4) | 36 (14.3)  |
| SOFA score, median [IQR]         | 6 [3-9]    | 6 [3-8]    |
| Ventilation, n (%)               | 460 (62.0) | 147 (55.3) |
| Mechanical ventilation           | 363 (48.9) | 117 (44.0) |
| Non invasive ventilation         | 237 (31.9) | 65 (24.4)  |
| Amine use, n (%)                 | 387 (52.2) | 121 (45.5) |
| Renal replacement therapy, n (%) | 205 (27.6) | 66 (24.8)  |
| Dialysis                         | 111 (15.0) | 40 (15.0)  |
| CVVH                             | 114 (15.4) | 32 (12.0)  |

---

*ALL* acute lymphocytic leukemia, *AML* acute myeloid leukemia, *BMT* bone marrow transplantation, *CLL* chronic lymphocytic leukemia, *CML* chronic myeloid leukemia, *CVVH* continuous veno-venous hemofiltration, *ED* emergency department, *HSCT* hematopoietic stem-cell transplantation, *ICU* intensive care unit, *IQR* interquartile range, *MDS* myelodysplastic syndrome, *PS* performance status, *SOFA* Sequential Related Organ Failure Assessment
